# Supplementary material
Source: PubMed Central journal article supplement (PMC9335219)
Supplement: NIHMS1822415-supplement-1.pdf [file NIHMS1822415-supplement-1.pdf]

Supplemental Table 1.

| <b>mRNA Target</b>          | <b>Primer Sequences</b>                                                                              |
|-----------------------------|------------------------------------------------------------------------------------------------------|
| <b><i>Bdnf total</i></b>    | Primer 1: 5' – CCATAAGGACGCGGACTTGTAC -3'<br>Primer 2: 5' – AGACATGTTTGCGGCATCCAGG -3'               |
| <b><i>Bdnf IV</i></b>       | Primer 1: 5'- CAGAGCAGCTGCCTTGATGTT -3'<br>Primer 2: 5'- GCCTTGTCCTGGACGTTTA -3'                     |
| <b><i>ActB</i></b>          | Primer 1: 5'- GAC TCA TCG TAC TCC TGC TTG – 3'<br>Primer 2: 5' – GAT TAC TGC TCT GGC TCC TAG – 3'    |
| <b><i>NR2A (Grin2a)</i></b> | Primer 1: 5' – TGC TCA TCA CCT CAT TCT TCT C – 3'<br>Primer 2: 5' – GAT TGA CCT CGC TCT GCT C – 3'   |
| <b><i>NR2B (Grin2b)</i></b> | Primer 1: 5' – CAC AAA CAT CAT CAC CCA CAC -3'<br>Primer 2: 5' – TTG ACT TCT CTG TGC CCT TC – 3'     |
| <b><i>GLUR1 (Gria1)</i></b> | Primer 1: 5' – TGG CGA GGA TGT AGT GGT A – 3'<br>Primer 2: 5' – AAG AAA AAG GAG AGG CTG GTG – 3'     |
| <b><i>Gapdh</i></b>         | Primer 1: 5' – AAT GGT GAA GGT CGG TGT G – 3'<br>Primer 2: 5' – GTG GAG TCA TAC TGG AAC ATG TAG – 3' |
